# Supplementary material for: Alternative Realities: Faculty and Student Perceptions of Instructional Practices in Laboratory Courses
Source: Atypon-hosted journal article supplement (doi:10.1187/cbe.16-03-0139), 2016-11-04
Supplement: combinedsupmats.pdf [file combinedsupmats.pdf]

# Supplemental Material

*CBE—Life Sciences Education*

Beck and Blumer

## **Self-Efficacy Pre-Test** (based on Champagne, 1989)

The following questions ask you to rate your confidence in certain abilities. To rate your level of confidence, use a scale of 1 to 5, with 1 meaning 'not confident' and 5 meaning 'very confident.'

How confident are you in your ability to:

1. Pose a question that can be addressed through scientific experimentation, e.g. state a testable hypothesis
2. Provide a scientific explanation for a natural process, e.g. photosynthesis, digestion, combustion
3. Assess the appropriateness of the methodology of an experiment
4. Read and understand articles on science in the newspaper
5. Read and interpret graphs displaying scientific information
6. Design an experiment that is a valid test of a hypothesis
7. Assess the accuracy of scientific statements, e.g. the seasons change with the distance of the earth from the sun
8. Give an instance of how a scientific discovery or idea has affected society e.g. the germ theory of disease
9. Challenge authority on evidence that supports scientific statements
10. Describe natural phenomena, e.g. the phases of the moon
11. Apply scientific information in personal decision- making, e.g. ozone depletion and the use of aerosols
12. Locate valid scientific information when needed

Champagne, A.B. (1989). Defining scientific literacy. *Educ Leadership* 47, 85-86.

## **Instructional Practices Survey -- Post-Test**

### **Instructional Strategies**

**How often were the following true about the laboratory portion of your class? We are only interested in the laboratory part of the class, rather than the lecture portion.**

Please choose the appropriate response for each item: Never, Seldom, Often or All the Time

1. Your instructor lectured in lab.
2. You participated in whole-class discussions where your instructor talked less than the students.
3. You are asked to apply prior knowledge to new tasks.
4. You work on activities that have a range of possible outcomes and solutions rather than a single correct response.
5. You collect evidence of your own learning.
6. You make presentations to explain what you have learned.
7. You work on projects that are meaningful to you.
8. You work on tasks without fear of embarrassment, punishment, or implications that you are inadequate.
9. You develop experimental designs by following a set of detailed requirements.
10. Your experimental design looks very similar to the designs of other students in your class.

**To what extent was the following true about the laboratory portion of your class? Again, we are only interested in the laboratory part of the class, rather than the lecture portion.**

### **I worked on projects...**

Please choose the appropriate response for each item: Not at All, Very Little, Somewhat or A Great Deal

11. Requiring a significant investment of time and intellectual resources.
12. Requiring me to apply knowledge from one or more disciplines or content areas.
13. Using research methods from one or more disciplines.
14. That allow me to figure out what the information means.
15. In which the correct results are already known.
16. Grounded in real life and work.
17. Requiring me to develop my own experimental procedures.
18. Requiring me to learn and use skills that are expected of practicing scientists (e.g. technology, teamwork, problem solving)
19. Requiring me to arrive at a specific experimental design that my instructor has in mind.

20. In which my instructor provides me with experimental design protocols.
21. Requiring me to use various methods, media and sources to conduct an investigation.
22. Requiring me to justify my results with evidence from my experiments.

### **Assessment Strategies**

**How often were the following true about your laboratory portion of your class? Again, we are only interested in the laboratory part of the course, not the lecture portion.**

Please choose the appropriate response for each item: Never, Seldom, Often, or All the Time

23. I used project criteria (rubrics) that I helped establish to gauge what I am learning.
24. My instructor graded students through methods such as presentations, portfolios, and exhibitions.
25. I knew exactly how my work would be assessed.
26. My instructor provided me with examples of exemplary work and scoring guidelines.
27. My instructor provided me with specific, descriptive feedback focused on next steps.
28. I can define what it looks like to master each topic.
29. I can describe what I was supposed to learn.
30. I can describe what comes next in my learning.

## **Revised Instructional Practices Survey -- Post-Test**

The following 24 items are those that had sufficient factor loadings and were grouped in the five constructs used in the Instructional Practices analysis.

### **Instructional Strategies**

**How often were the following true about the laboratory portion of your class? We are only interested in the laboratory part of the class, rather than the lecture portion.**

Please choose the appropriate response for each item: Never, Seldom, Often or All the Time

1. You participated in whole-class discussions where your instructor talked less than the students. (Science Process Skills)
2. You are asked to apply prior knowledge to new tasks. (Science Process Skills)
3. You work on activities that have a range of possible outcomes and solutions rather than a single correct response. (Science Process Skills)
4. You make presentations to explain what you have learned. (Science Process Skills)

**To what extent was the following true about the laboratory portion of your class? Again, we are only interested in the laboratory part of the class, rather than the lecture portion.**

### **I worked on projects...**

Please choose the appropriate response for each item: Not at All, Very Little, Somewhat or A Great Deal

5. Requiring a significant investment of time and intellectual resources. (Scientific Synthesis)
6. Requiring me to apply knowledge from one or more disciplines or content areas. (Scientific Synthesis)
7. Using research methods from one or more disciplines. (Science Process Skills)
8. That allow me to figure out what the information means. (Scientific Synthesis)
9. In which the correct results are already known. (Instructor-directed Teaching)
10. Grounded in real life and work. (Scientific Synthesis)
11. Requiring me to develop my own experimental procedures. (Science Process Skills)
12. Requiring me to learn and use skills that are expected of practicing scientists (e.g. technology, teamwork, problem solving) (Scientific Synthesis)
13. Requiring me to arrive at a specific experimental design that my instructor has in mind. (Instructor-directed Teaching)

14. In which my instructor provides me with experimental design protocols. (Instructor-directed Teaching)
15. Requiring me to use various methods, media and sources to conduct an investigation. (Scientific Synthesis)
16. Requiring me to justify my results with evidence from my experiments. (Scientific Synthesis)

### **Assessment Strategies**

**How often were the following true about your laboratory portion of your class? Again, we are only interested in the laboratory part of the course, not the lecture portion.**

Please choose the appropriate response for each item: Never, Seldom, Often, or All the Time

17. I used project criteria (rubrics) that I helped establish to gauge what I am learning. (Science Process Skills)
18. My instructor graded students through methods such as presentations, portfolios, and exhibitions. (Science Process Skills)
19. I knew exactly how my work would be assessed. (Feedback and Assessment)
20. My instructor provided me with examples of exemplary work and scoring guidelines. (Feedback and Assessment)
21. My instructor provided me with specific, descriptive feedback focused on next steps. (Feedback and Assessment)
22. I can define what it looks like to master each topic. (Metacognition)
23. I can describe what I was supposed to learn. (Metacognition)
24. I can describe what comes next in my learning. (Metacognition)

## Supplemental Materials

Table S1: Factor loading table for seven factors (eigenvalue > 1)

|        |                                                                                                                              | Component |      |      |      |   |   |   |
|--------|------------------------------------------------------------------------------------------------------------------------------|-----------|------|------|------|---|---|---|
|        |                                                                                                                              | 1         | 2    | 3    | 4    | 5 | 6 | 7 |
| Item28 | I can define what it looks like to master each topic.                                                                        | .742      |      |      |      |   |   |   |
| Item29 | I can describe what I was supposed to learn.                                                                                 | .740      |      |      |      |   |   |   |
| Item30 | I can describe what comes next in my learning.                                                                               | .736      |      |      |      |   |   |   |
| Item25 | I knew exactly how my work would be assessed.                                                                                | .648      |      |      |      |   |   |   |
| Item27 | My instructor provided me with specific, descriptive feedback focused on next steps.                                         | .642      |      |      |      |   |   |   |
| Item26 | My instructor provided me with examples of exemplary work and scoring guidelines.                                            | .584      |      |      |      |   |   |   |
| Item12 | Requiring me to apply knowledge from one or more disciplines or content areas.                                               |           | .759 |      |      |   |   |   |
| Item13 | Using research methods from one or more disciplines.                                                                         |           | .737 |      |      |   |   |   |
| Item11 | Requiring a significant investment of time and intellectual resources.                                                       |           | .562 |      |      |   |   |   |
| Item17 | Requiring me to develop my own experimental procedures.                                                                      |           | .541 |      |      |   |   |   |
| Item21 | Requiring me to use various methods, media and sources to conduct an investigation.                                          |           | .502 |      |      |   |   |   |
| Item18 | Requiring me to learn and use skills that are expected of practicing scientists (e.g. technology, teamwork, problem solving) |           |      | .723 |      |   |   |   |
| Item22 | Requiring me to justify my results with evidence from my experiments.                                                        |           |      | .688 |      |   |   |   |
| Item14 | That allow me to figure out what the information means.                                                                      |           |      | .640 |      |   |   |   |
| Item16 | Grounded in real life and work.                                                                                              |           |      | .385 |      |   |   |   |
| Item2  | You participated in whole-class discussions where your instructor talked less than the students.                             |           |      |      | .625 |   |   |   |
| Item3  | You are asked to apply prior knowledge to new tasks.                                                                         |           | .406 |      | .419 |   |   |   |
| Item4  | You work on activities that have a range of possible outcomes and solutions rather than a single correct response.           |           |      |      | .399 |   |   |   |
| Item6  | You make presentations to explain what you have learned.                                                                     |           |      |      | .607 |   |   |   |
| Item7  | You work on projects that are meaningful to you.                                                                             |           |      |      | .627 |   |   |   |

|        |                                                                                                       |  |  |  |  |      |      |      |
|--------|-------------------------------------------------------------------------------------------------------|--|--|--|--|------|------|------|
| Item23 | I used project criteria (rubrics) that I helped establish to gauge what I am learning                 |  |  |  |  | .683 |      |      |
| Item24 | My instructor graded students through methods such as presentations, portfolios, and exhibitions.     |  |  |  |  | .534 |      |      |
| Item1  | Your instructor lectured in lab.                                                                      |  |  |  |  | .406 |      |      |
| Item15 | In which the correct results are already known.                                                       |  |  |  |  |      | .723 |      |
| Item19 | Requiring me to arrive at a specific experimental design that my instructor has in mind.              |  |  |  |  |      | .562 |      |
| Item20 | In which my instructor provides me with experimental design protocols.                                |  |  |  |  |      | .601 |      |
| Item5  | You collect evidence of your own learning.                                                            |  |  |  |  |      |      | .456 |
| Item8  | You work on tasks without fear of embarrassment, punishment, or implications that you are inadequate. |  |  |  |  |      |      | .470 |
| Item9  | You develop experimental designs by following a set of detailed requirements.                         |  |  |  |  |      |      | .735 |
| Item10 | Your experimental design looks very similar to the designs of other students in your class.           |  |  |  |  |      |      | .557 |



Table S2: Regression models for the relationship between faculty perceptions and student perceptions for each construct at the course level

|                                     | Sum of Squares | df | Mean Square | F     | P     |
|-------------------------------------|----------------|----|-------------|-------|-------|
| <b>Metacognition</b>                |                |    |             |       |       |
| Faculty Perception                  | 0.29           | 1  | 0.29        | 3.90  | 0.06  |
| Residual                            | 2.78           | 37 | 0.08        |       |       |
| Total                               | 3.07           | 38 |             |       |       |
| <b>Feedback &amp; Assessment</b>    |                |    |             |       |       |
| Faculty Perception                  | 0.20           | 1  | 0.20        | 1.44  | 0.24  |
| Residual                            | 5.20           | 37 | 0.14        |       |       |
| Total                               | 5.40           | 38 |             |       |       |
| <b>Scientific Synthesis</b>         |                |    |             |       |       |
| Faculty Perception                  | 0.55           | 1  | 0.55        | 14.16 | 0.001 |
| Residual                            | 1.45           | 37 | 0.04        |       |       |
| Total                               | 2.00           | 38 |             |       |       |
| <b>Science Process Skills</b>       |                |    |             |       |       |
| Faculty Perception                  | 0.07           | 1  | 0.07        | 2.62  | 0.11  |
| Residual                            | 1.00           | 37 | 0.03        |       |       |
| Total                               | 1.07           | 38 |             |       |       |
| <b>Instructor-directed Teaching</b> |                |    |             |       |       |
| Faculty Perception                  | 0.29           | 1  | 0.29        | 3.29  | 0.08  |
| Residual                            | 3.20           | 37 | 0.09        |       |       |
| Total                               | 3.48           | 38 |             |       |       |

Table S3: Regression models for the relationship between faculty perceptions and student perceptions for each construct at the instructor level

|                                     | Sum of Squares | df | Mean Square | F    | P    |
|-------------------------------------|----------------|----|-------------|------|------|
| <b>Metacognition</b>                |                |    |             |      |      |
| Faculty Perception                  | 0.24           | 1  | 0.24        | 3.94 | 0.06 |
| Residual                            | 1.17           | 19 | 0.06        |      |      |
| Total                               | 1.41           | 20 |             |      |      |
| <b>Feedback &amp; Assessment</b>    |                |    |             |      |      |
| Faculty Perception                  | 0.03           | 1  | 0.03        | 0.27 | 0.61 |
| Residual                            | 2.17           | 19 | 0.11        |      |      |
| Total                               | 2.20           | 20 |             |      |      |
| <b>Scientific Synthesis</b>         |                |    |             |      |      |
| Faculty Perception                  | 0.14           | 1  | 0.14        | 5.08 | 0.04 |
| Residual                            | 0.53           | 19 | 0.03        |      |      |
| Total                               | 0.67           | 20 |             |      |      |
| <b>Science Process Skills</b>       |                |    |             |      |      |
| Faculty Perception                  | 0.06           | 1  | 0.06        | 3.12 | 0.09 |
| Residual                            | 0.37           | 19 | 0.02        |      |      |
| Total                               | 0.43           | 20 |             |      |      |
| <b>Instructor-directed Teaching</b> |                |    |             |      |      |
| Faculty Perception                  | 0.22           | 1  | 0.22        | 5.75 | 0.03 |
| Residual                            | 0.72           | 19 | 0.04        |      |      |
| Total                               | 0.94           | 20 |             |      |      |
